# 1 Targeted genome editing in *Nicotiana tabacum* using 2 inducible CRISPR/Cas9 system

3 Chong Ren<sup>1</sup>, Yanfei Liu<sup>1,2</sup>, Xida Wang<sup>1,2</sup>, Yuchen Guo<sup>1,2</sup>, Peige Fan<sup>1</sup>, Shaohua Li<sup>1</sup> and Zhenchang  
4 Liang<sup>1\*</sup>

5 <sup>1</sup> Beijing Key Laboratory of Grape Science and Enology, and CAS Key Laboratory of Plant Resources,  
6 Institute of Botany, the Innovative Academy of Seed Design, the Chinese Academy of Sciences, Beijing  
7 100093, PR China

8 <sup>2</sup> University of Chinese Academy of Sciences, Beijing 100049, PR China

9 \* Correspondence: zl249@ibcas.ac.cn; Tel.: +86-010-62836064

10 **Abstract:** Targeted genome editing has been achieved in multiple plant species using the clustered  
11 regularly interspaced short palindromic repeats (CRISPR)-associated protein 9 (CRISPR/Cas9)  
12 system, in which the *Cas9* gene is usually driven by constitutive promoters. However, constitutive  
13 expression of *Cas9* is not necessary and can be harmful to plant development. In this study, we  
14 developed an estrogen-inducible CRISPR/Cas9 system by taking advantage of the chimeric  
15 transcription activator XVE and tested the efficacy of this inducible system in *Nicotiana tabacum* by  
16 targeting the phytoene desaturase (*NtPDS*) gene, whose mutation resulted in albino phenotypes.  
17 Treatment of four independent transgenic lines with exogenous estradiol successfully induced  
18 targeted mutagenesis in *NtPDS*. Sanger sequencing assay uncovered the presence of indel  
19 mutations (nucleotides insertions or deletions) at the target site as expected, and at least two types  
20 of mutations were identified for each line. Transgenic plants with mutated *NtPDS* gene after  
21 estradiol treatment exhibited pale green or incomplete albino leaves. Moreover, the expression of  
22 *Cas9* in transgenic plants was strongly induced by estradiol treatment. Our results demonstrate  
23 the efficacy of XVE-based CRISPR/Cas9 system in *N. tabacum*, and the system reported here  
24 promises to be a useful approach for conditional genome editing, which would facilitate the study  
25 of genes of interest, especially those developmentally important genes.

26 **Keywords:** XVE system; CRISPR/Cas9; inducible genome editing; *Nicotiana tabacum*  
27

---

## 28 1. Introduction

29 Targeted genome editing (TGE) plays a significant role in functional study of genes of interest,  
30 trait improvement of crops and development of new cultivars [1,2,3]. Engineered nucleases, such as  
31 zinc finger nucleases (ZFNs), transcription activator-like effector nucleases (TALENs) and clustered  
32 regularly interspaced short palindromic repeats (CRISPR)-associated protein 9 (CRISPR/Cas9), are  
33 generally employed to accomplish TGE in plants [4,5,6,7]. Among them, the CRISPR/Cas9 system is  
34 predominantly used for TGE due to its simplicity, high efficiency and versatility [8]. In most cases,  
35 the *Cas9* encoding gene is driven by constitutive promoters, such as CaMV 35S and ubiquitin  
36 promoters [9,10,11,12,13]. However, constitutive expression of *Cas9* might be harmful to cells, or  
37 increase the risk of off-target effect [14,15]. More importantly, it is not feasible using this  
38 constitutive CRISPR/Cas9 system to generate homologous knockouts of developmentally important  
39 genes, especially those genes involved in regeneration, reproduction, or even lethality.

40 Inducible gene expression systems allowing temporal expression of target genes are employed  
41 as powerful tools for research in plant functional genomics [16]. Chemical-inducible systems have  
42 been widely used in plants, and inducible systems responding to different chemical inducers, such  
43 as estradiol [17,18,19], ethanol [20,21,22,23], glucocorticoid [24,25], ecdysone [26], and tetracycline  
44 [27] have been successfully developed. However, some of these systems have limitations during  
45 their applications. For instance, application of ethanol would cause toxic effects on treated plants,  
46 and unwanted activation of gene expression can be triggered in neighboring plants due to the

47 volatile nature of the inducer when using ethanol-inducible system [28]. The application of  
48 glucocorticoid-inducible system, however, was found to cause growth defects in several plant  
49 species, including Arabidopsis, tobacco and rice [24,29,30]. The estradiol-inducible system, based on  
50 transcriptional activator XVE [18], has been applied to multiple plant species, and no physiological  
51 or morphological effect was observed on treated plants [16,18,19,31,32]. Inducible systems are  
52 previously used to remove selectable markers or investigate expression patterns of target genes in  
53 transgenic plants [19,32,33]. Tang and Liu [34] adopted inducible promoters to drive the expression  
54 of *Cas9* or base editors to record stimuli events in both bacteria and mammalian cells. In plants,  
55 Tang et al. [35] employed the estrogen-inducible (XVE) promoter to drive the expression of  
56 CRISPR/Cas9 reagents in rice. Very recently, inducible genome editing was reported in Arabidopsis  
57 based on the estrogen-inducible XVE system [36]. However, targeted genome editing based on  
58 inducible systems in other plant species is still less studied.

59 Here we developed inducible CRISPR/Cas9 system by taking advantage of the  
60 estrogen-inducible XVE system, and the phytoene desaturase (*NtPDS*) gene, whose mutation  
61 generally results in visible albino phenotypes [11,37], was chosen as a proof-of-concept target for  
62 conditional genome editing in the model plant *Nicotiana tabacum*. Prior to the inducible genome  
63 editing, we first tested the efficacy of the XVE system by investigating gene expression of *GUS*  
64 ( $\beta$ -glucuronidase) in transgenic tobacco plants upon estradiol treatment. GUS staining revealed that  
65 XVE-controlled expression of *GUS* reporter gene was induced by exogenous estradiol treatment.  
66 Similar result was obtained in estradiol-treated transgenic plants using the *Cas9* gene instead of  
67 *GUS* reporter gene. Under normal conditions, the transgenic plants showed none of any  
68 *PDS*-defective phenotypes, and no mutation was detected at the target site in *NtPDS* gene. By  
69 contrast, after exposure to estradiol, the transgenic plants exhibited etiolation or albino phenotypes.  
70 Sanger sequencing assay showed that the *NtPDS* gene was successfully edited after estradiol  
71 treatment. The obtained results demonstrate the efficacy of XVE-controlled CRISPR/Cas9 system in  
72 *N. tabacum*, and our method described here thereby provide a useful approach for conditional  
73 genome editing in plants.

## 74 2. Results

### 75 2.1. XVE stringently mediates the expression of *GUS* gene upon estradiol treatment

76 The *GUS* gene was amplified and introduced into the XVE vector pER8 [18] to generate the  
77 estrogen-inducible expression construct pER-GUS (Figure 1a). The GUS reporter is a reliable and  
78 extremely sensitive system that allows histochemical assessment of gene activity in plants [16,38].  
79 After transformation of *N. tabacum*, hygromycin-resistant plants that can develop roots on  
80 hygromycin-containing medium (Figure S1) were selected as candidates for PCR identification.  
81 Those plants identified with exogenous *GUS* gene were selected as transgenic plants (Figure 1b and  
82 Figure S2). Among the 98 tested plants, 21 plants were identified with exogenous T-DNA insertions,  
83 with a transformation rate of 21.43% (Figure 1c). These obtained T0 plants were subcultured on  
84 Murashige and Skoog (MS) medium and were used for estradiol treatment. Sixteen out of the 21  
85 transgenic plants were randomly selected and divided into two groups and were treated with or  
86 without estradiol. Histochemical staining revealed strong GUS activity in pER-GUS-transformed  
87 plants after treatment with 20  $\mu$ M estradiol (Figure 2a,b). Interestingly, GUS staining was only  
88 detected in roots and lower leaves, while no GUS staining was observed in upper leaves (Figure 2a  
89 and Figure S3). As shown in Figure 2a, strong GUS expression was detected in roots and leaf 1-2 of  
90 the estradiol-treated lines. By contrast, no GUS staining was observed in leaves (leaf 5 and 6 of line  
91 7, leaf 7 and 8 of line 8, and leaf 8 and 9 of line 9) that are distal to the roots. From the eight  
92 independent transgenic lines without treatment with estradiol, two lines showed weak GUS  
93 staining in roots, and the others, however, exhibited no GUS staining in either leaves or roots  
94 (Figure 2a,b).

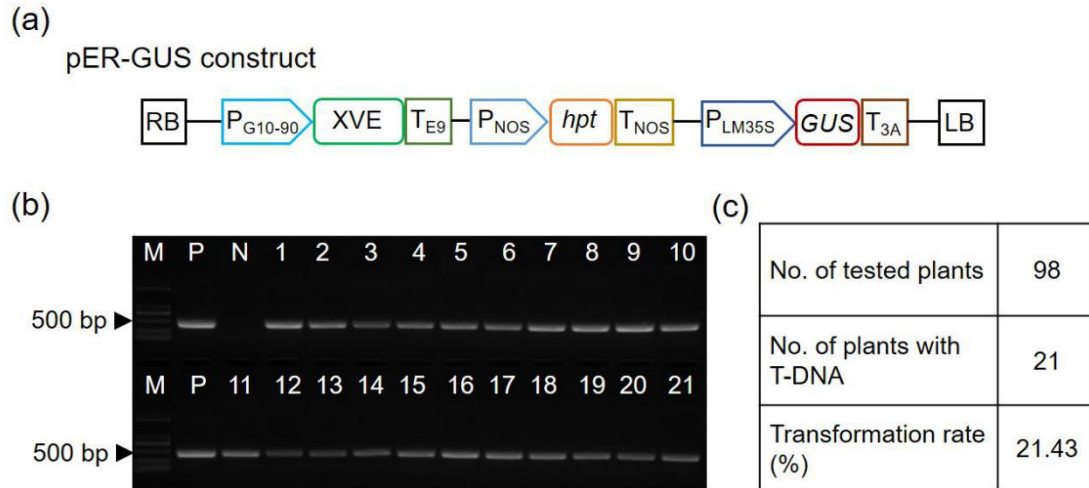

95

96 **Figure 1.** Generation of pER-GUS transgenic tobacco plants. (a) Schematic illustration of pER-GUS  
 97 construct. P<sub>G10-90</sub>, G10-90 promoter; XVE, chimeric transactivator containing the regulator domain of  
 98 an estrogen receptor; T<sub>E9</sub>, rbcS E9 terminator; P<sub>NOS</sub>, nopaline synthase promoter; hpt, hygromycin  
 99 phosphotransferase gene; T<sub>NOS</sub>, nopaline synthase terminator; P<sub>LM35S</sub>, 8 × LexA DNA binding site  
 100 fused with the -46 CaMV 35S minimal promoter; GUS, β-glucuronidase; T<sub>3A</sub>, rbcS 3A terminator; RB,  
 101 right border; LB, left border. (b) PCR identification of transgenic plants with *GUS*-specific primers.  
 102 The plasmid and wild-type DNA were used as the positive control (P) and negative control (N),  
 103 respectively. M, DNA marker; NC, no template control; lanes 1-21, different plant lines. (c)  
 104 Overview of the identification of transgenic plants. .

105 The results of histochemical staining assay suggest that systemic movement of estradiol was  
 106 limited within tobacco plants (Figure 2a). We therefore used small stem with an axillary bud for  
 107 induction analysis (Figure 2c). Stems derived from line 7 and 9 were cultured on induction medium  
 108 for four weeks, and GUS activity was then determined by histochemical staining. For transgenic  
 109 line 7, GUS staining was detected in all the leaves of the newly developed plant. Similar results was  
 110 observed in transgenic line 9, despite the difference in GUS staining intensity between different  
 111 leaves (Figure 2d). Taken together, the obtained results showed that XVE could regulate the  
 112 expression of *GUS* reporter gene stringently and efficiently in transgenic tobacco plants upon  
 113 estradiol treatment.

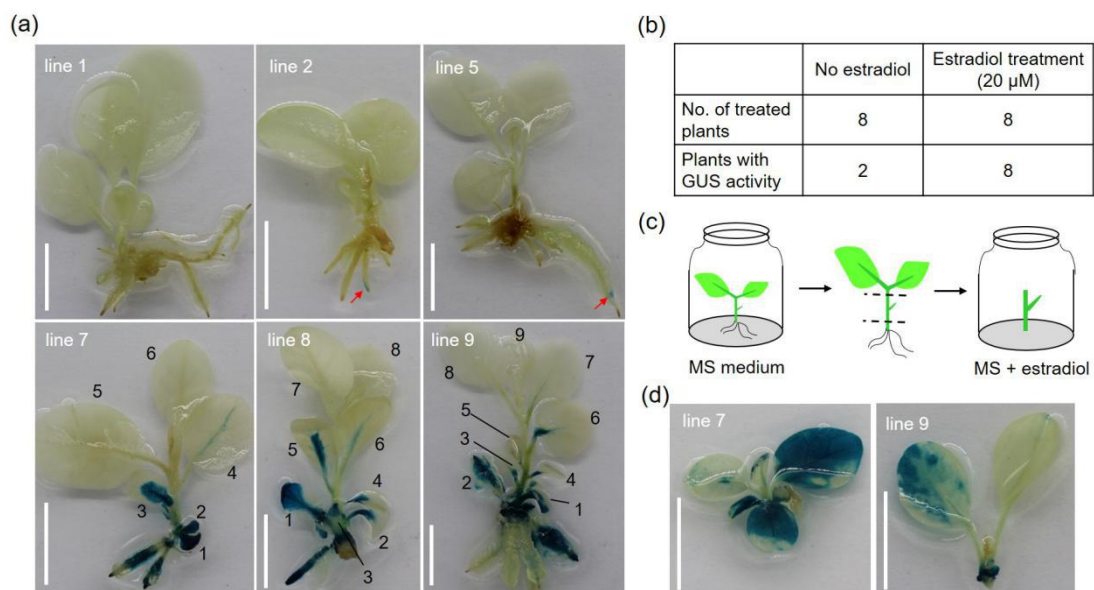

114

115 **Figure 2.** Histochemical staining assay of pER-GUS transgenic plants. (a) GUS staining of pER-GUS  
 116 transgenic plants treated with 0 or 20 μM estradiol. The self-rooted plants after subculture were

117 divided into two groups for estradiol treatment. The leaves were numbered consecutively from the  
 118 base of the treated plants (lower panel). The weak GUS staining observed in plants treated with 0  
 119  $\mu$ M estradiol (upper panel) was indicated in red arrows. Scale bars = 1 cm. (b) Overview of GUS  
 120 staining results. The small stems with single axillary buds derived from subcultured plants (c) were  
 121 used for estradiol treatment, and GUS staining results were shown in (d). Scale bars = 1 cm.

## 122 2.2. XVE-mediated targeted mutagenesis in transgenic tobacco plants

123 To develop the inducible CRISPR/Cas9 system, the *Cas9* gene was amplified from  
 124 pCACRISPR/Cas9 vector [10] and was cloned into pER8 instead of *GUS* reporter gene (Figure 3a).  
 125 Given that knockout of *PDS* gene generally leads to visible albino phenotype [11,37], a single guide  
 126 RNA (sgRNA) targeting the *NtPDS* gene [39] was introduced into pER-Cas9 construct to generate  
 127 the final expression vector pER-Cas9-NtPDS, in which the sgRNA is driven by AtU6 promoter  
 128 (Figure 3a). After transformation, a number of 15 plants were identified as transgenic lines after  
 129 hygromycin-dependent screening, followed by PCR identification with *hpt*-specific primers (Figure  
 130 3b, c). The amplified *hpt* gene fragments were further verified by Sanger sequencing (Figure S4).  
 131 Surprisingly, three lines (line #5, #7 and #13) showed incomplete pale phenotypes without estradiol  
 132 treatment (Figure 3d), and targeted mutagenesis was observed at the target sites (data not shown),  
 133 suggesting the “leaky” expression of *Cas9* in these plants. In addition, the development of  
 134 transgenic plants carrying pER-Cas9-NtPDS expression cassette appeared less affected when  
 135 compared with wild-type plants (Figure 3d).

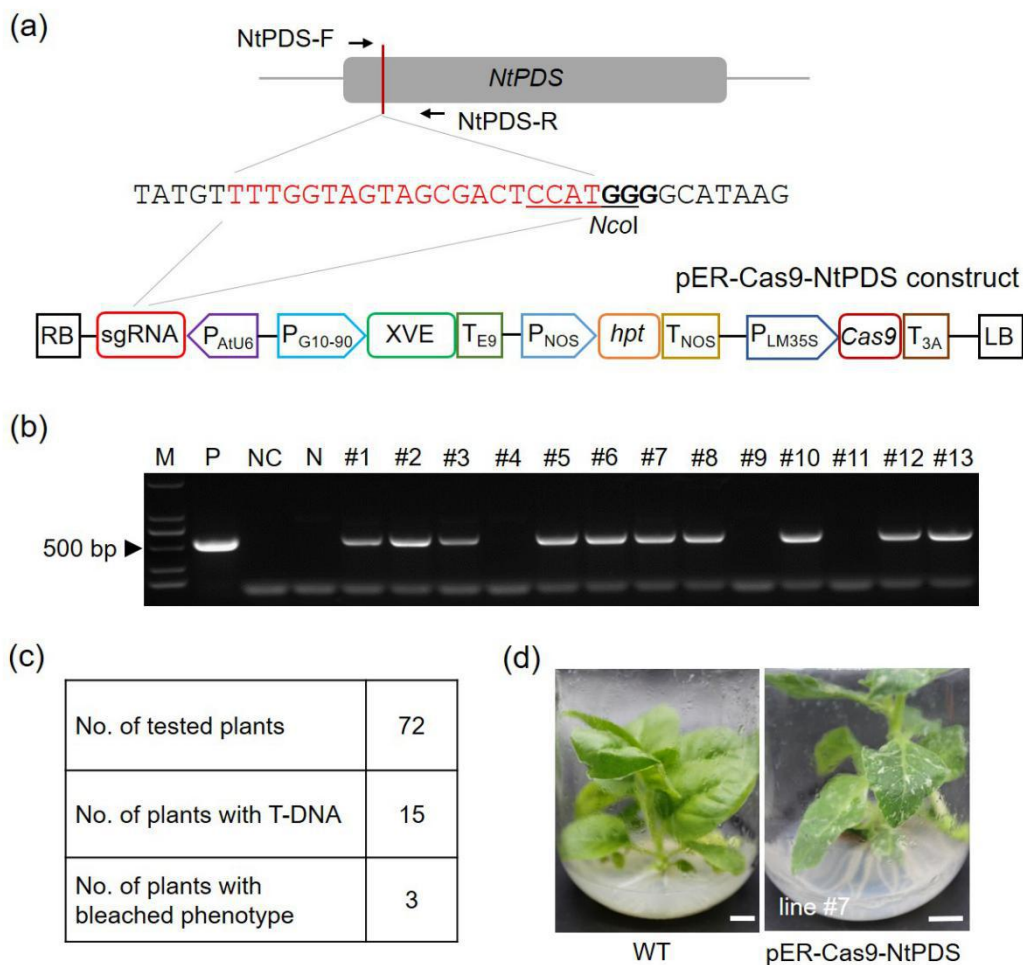

136

137 **Figure 3.** Generation of pER-Cas9-NtPDS transgenic tobacco plants. (a) The target sequence of  
 138 *NtPDS* gene and schematic diagram of pER-Cas9-NtPDS construct. The 20-bp target sequence is  
 139 indicated in red, and the PAM (protospacer adjacent motif) is in bold. The recognition sequence of  
 140 *NcoI* restriction enzyme is underlined. sgRNA, single guide RNA; Cas9, CRISPR-associated protein

141 9. (b) PCR identification of transgenic plants using *hpt*-specific primers. The plasmid and wild-type  
142 DNA were used as the positive control (P) and negative control (N), respectively. M, DNA marker;  
143 NC, no template control; lanes #1-#13, different plant lines. (c) Overview of PCR identification  
144 results. (d) Phenotype of transgenic plant with leaky expression of *Cas9*. The pER-Cas9-NtPDS  
145 transgenic line #7 with leaky expression of *Cas9*, as well as wild-type (WT) regenerated plant, is  
146 shown. Scale bars = 1 cm.

147 Four independent transgenic lines (line #1, #2, #6 and #10) without phenotypic alterations were  
148 selected for induction experiment. One-week-old plants after subculture were transferred to the  
149 estradiol-containing (20  $\mu$ M) MS medium and were cultured for another four weeks. After estradiol  
150 treatment, the basal leaves of all the four transgenic plants turned pale green (Figure 4a), suggesting  
151 disruption of the *NtPDS* gene. To investigate whether the phenotypic changes are caused by  
152 induced genome editing, we first checked the target sites in the four tested transgenic lines before  
153 estradiol treatment. The restriction enzyme (RE)/PCR assay is a useful method for mutation  
154 identification, and mutated genomic DNA, which is recalcitrant to enzyme digestions due to the  
155 destruction of available restriction enzyme sites, can be amplified by PCR [40,41]. The RE/PCR  
156 assay was performed with genomic DNA prepared from the four lines. The PCR results showed  
157 that no desired band was produced using *NcoI*-digested genomic DNA, similar to that of wild-type  
158 genomic DNA (Figure 4b). Additionally, the target region of *NtPDS* was amplified from the four  
159 lines, respectively, and was analyzed by Sanger sequencing, considering that Sanger sequencing  
160 assay of PCR products can directly uncover mutations from a pool of DNA sequences [42]. The  
161 sequencing chromatograms of the four lines turned out to be clear peaks (Figure 4c), suggesting  
162 that the target sequences in the four transgenic lines are unedited. Altogether, our sequencing  
163 results (Figure S5), together with RE/PCR results, demonstrated that there was no mutation at the  
164 target site in *NtPDS* gene in the four transgenic lines before estradiol treatment.

165 We then sampled the pale green leaves (Figure 5a) of the four transgenic lines after estradiol  
166 treatment for subsequent analysis. Similarly, we conducted RE/PCR assay, and desired bands,  
167 however, were produced using *NcoI*-treated genomic DNA (Figure 5b), suggesting the presence of  
168 mutations in genomic DNA sequences. Moreover, Sanger sequencing results of PCR products  
169 revealed targeted mutagenesis in *NtPDS* gene (Figure 5c,d). Targeted mutagenesis resulted in  
170 overlapping peaks starting from the mutation site (Figure 5c), which is in agreement with previous  
171 report [42]. Sequencing results of PCR amplicons uncovered indel mutations at the target site. Most  
172 mutations were single nucleotide insertions or deletions (Figure 5d), which is consistent with  
173 previous reports in other plant species [9,43]. Notably, at least two types of mutations, as well as  
174 wild-type sequences, were detected in each line (Figure 5d), suggesting that these transgenic plants  
175 were probably chimeras. Taken together, these results showed that *NtPDS* gene in the four  
176 transgenic lines was successfully edited after estradiol treatment, and mutation of *NtPDS* resulted in  
177 development of pale green leaves.  
178

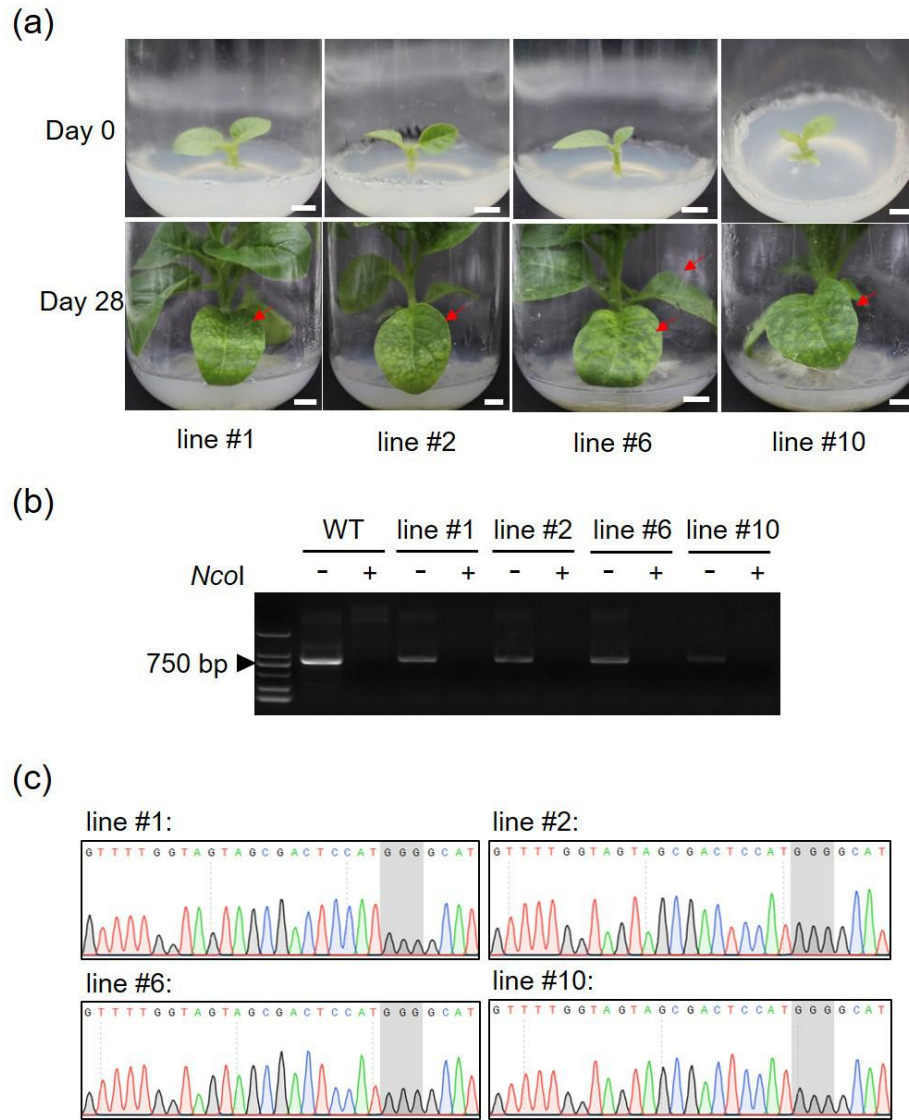

179

180 **Figure 4.** Verification of the target site in *NtPDS* gene in pER-Cas9-*NtPDS* transgenic plants before  
 181 estradiol treatment. (a) The transgenic plantlets before (Day 0) and after (Day 28) estradiol treatment.  
 182 Four independent transgenic lines, line #1, #2, #6 and #10, were used for treatment. One-week-old  
 183 plants after subculture (Day 0) were transferred to estradiol-containing (20  $\mu$ M) medium and were  
 184 cultured for another 4 weeks (Day 28). The excised leaves of the four plantlets before estradiol  
 185 treatment were sampled for subsequent identification. The pale green leaves developed after  
 186 estradiol treatment were indicated in red arrows. Scale bars = 1 cm. (b) Restriction enzyme (RE)/PCR  
 187 assay. The genomic DNA prepared from untreated plants was digested with *NcoI* enzyme to  
 188 remove wild-type (WT) DNA. Only mutated sequences with destructed restriction enzyme site are  
 189 recalcitrant to digestion and can be amplified by PCR. +, digestion with *NcoI*; -, no digestion. (c)  
 190 Chromatograms of Sanger sequencing. The target sequences amplified with digested or undigested  
 191 genomic DNA were analyzed by Sanger sequencing. The wild-type or unedited sequences  
 192 generated sequencing chromatograms with single peaks [42]. The PAM sequences are highlighted in  
 193 grey.

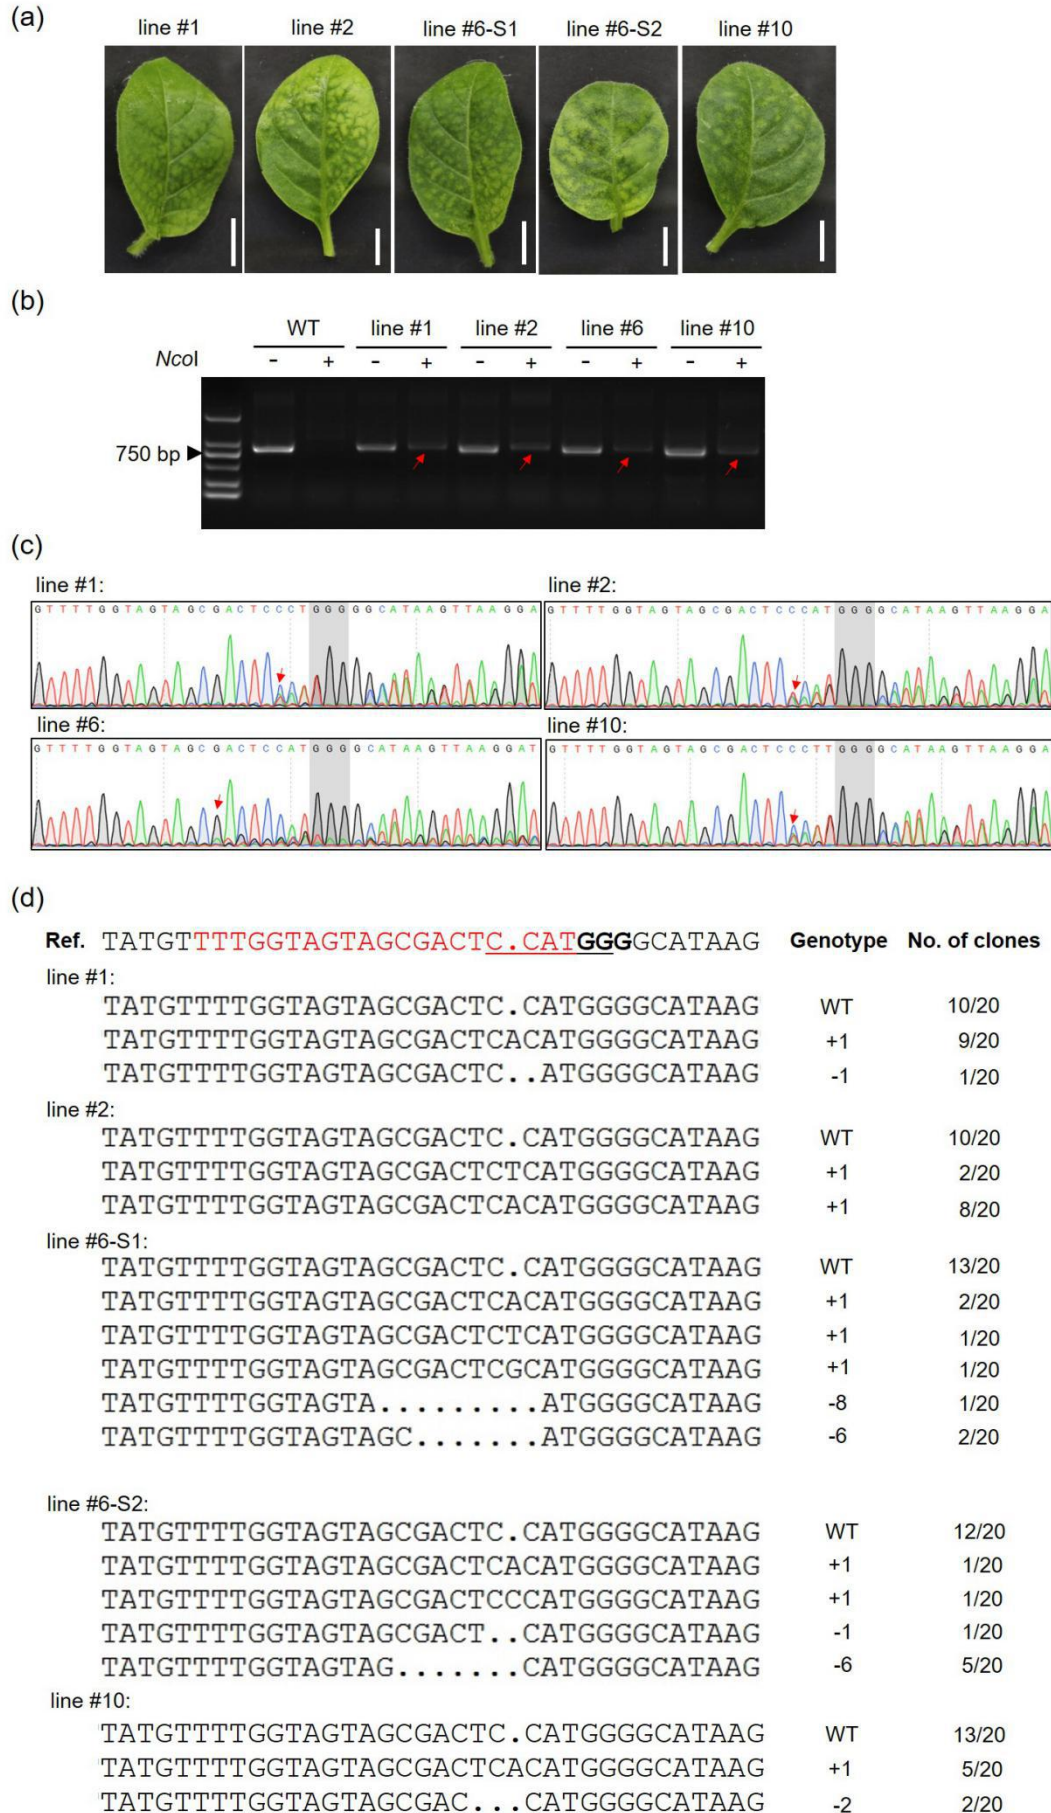

195 **Figure 5.** Induced mutation of *NtPDS* gene in pER-Cas9-NtPDS transgenic plants after estradiol  
196 treatment. (a) The leaves used for mutation detection. The pale green leaves of transgenic line #1, #2,  
197 #6 and #10 were sampled for our analysis. The two leaves of transgenic line #6 were marked as line  
198 #6-S1 and line #6-S2, respectively. Scale bars = 1 cm. (b) RE/PCR assay. The genomic DNA was  
199 digested with *NcoI* enzyme and was then used for PCR amplification. The bands of possible  
200 mutated DNA sequences are indicated in red arrows. +, digestion with *NcoI*; -, no digestion. (c)  
201 Sequencing chromatograms of the target sequences. The PCR products were directly analyzed by  
202 Sanger sequencing. Overlapping peaks were produced starting from the mutation sites (indicated in  
203 red arrows) near the PAM sequences (highlighted in grey) in the sequencing chromatograms [42]. (d)  
204 Mutation types identified from each transgenic line. The PCR products were further cloned into pLB  
205 vector and 20 clones of PCR amplicons were analyzed by Sanger sequencing. The mutation types  
206 and corresponding number of clones are shown on the right. The sequence of sgRNA is in red, and  
207 the PAM sequence is in bold. The recognition sequence of *NcoI* restriction enzyme is underlined.  
208 Ref., reference sequence.

### 209 2.3. The expression of *Cas9* is strongly induced by estradiol

210 The expression profiles of *Cas9* in the four tested transgenic lines (line #1, #2, #6 and #10) with  
211 or without estradiol treatment were characterized using qRT-PCR assay. As mentioned above, three  
212 independent lines (line #5, #7 and #13) exhibited incomplete albino phenotypes without estradiol  
213 treatment (Figure 3d), and qRT-PCR results revealed a relatively high expression level of *Cas9* in  
214 these plants in the absence of exogenous estradiol (Figure 6). By contrast, the transcript level of *Cas9*  
215 in line #1, #2, #6 and #10 without estradiol treatment was extremely low when compared with the  
216 leaky expression lines (Figure 6). However, after exposure to estradiol, the transcript abundance of  
217 *Cas9* in the four transgenic lines was significantly increased (Figure 6), suggesting that the  
218 expression of *Cas9* is strongly induced by exogenous estradiol.

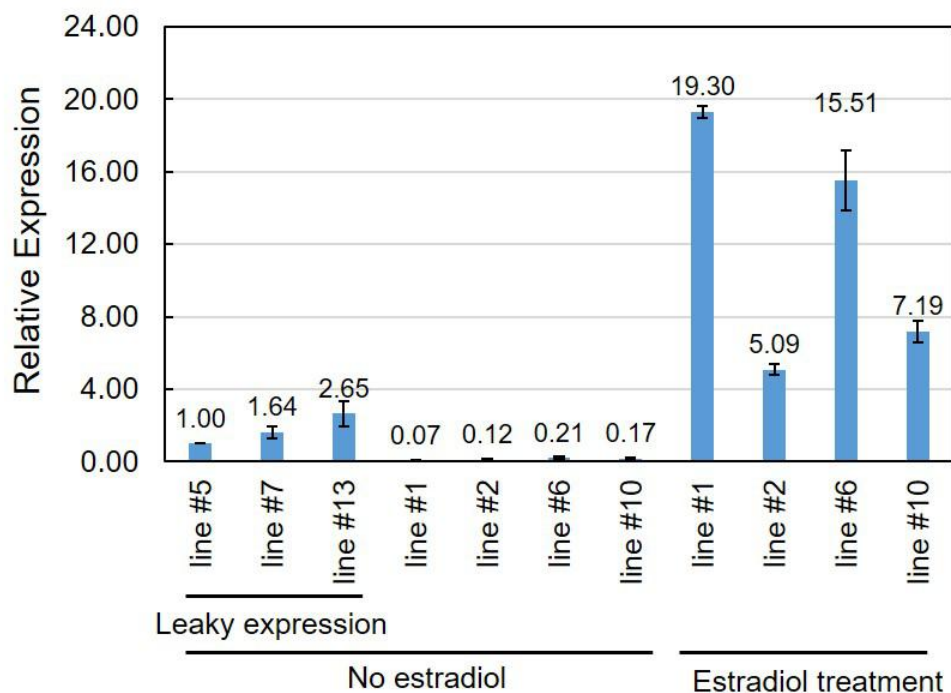

219

220 **Figure 6.** Expression profiles of *Cas9* gene in pER-Cas9-NtPDS transgenic lines upon estradiol  
221 treatment. The transgenic line #5, #7 and #13 with white parts in their leaves under uninduced  
222 conditions had leaky expression of *Cas9*. The line #5 was used as the control and the expression of  
223 *Cas9* in other transgenic lines relative to line #5 was determined by qRT-PCR. The relative  
224 expression level of *Cas9* was calculated using the  $2^{-\Delta\Delta CT}$  method [51] with the tobacco  $\beta$ -Tubulin  
225 encoding gene (accession number: U91564) being used as the internal control. The experiment was  
226 repeated three times. The data is shown as means  $\pm$  SD.



227 2.4. The type of explants used for estradiol treatment has an effect on genome editing

228 According to the GUS staining results described above, the use of single axillary bud for  
 229 treatment with estradiol appeared to contribute to strong GUS staining in developed plants (Figure  
 230 2d). Thus, we used small stems with single axillary buds of transgenic line #1 and #2 for induction  
 231 analysis. After treatment with estradiol, the newly developed plantlets showed white rather than  
 232 pale green parts in their leaves (Figure 7a), suggesting knockout of *NtPDS* gene in these plants. As  
 233 expected, indel mutations were detected in *NtPDS* gene in the two transgenic lines (Figure 7b).

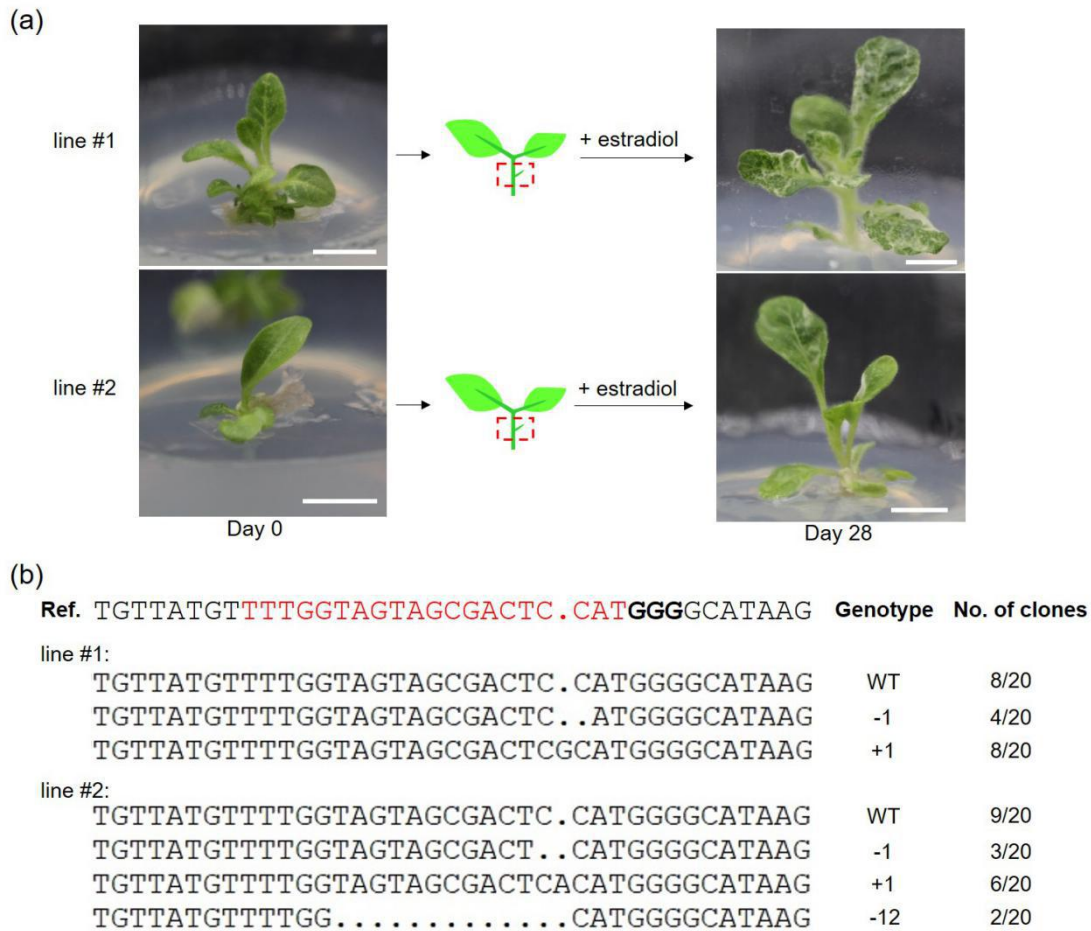

234

235 **Figure 7.** Induction analysis with single axillary buds. (a) Estradiol treatment of single axillary buds.  
 236 The leaves and roots of in vitro plantlets (Day 0) were excised and small stems with single axillary  
 237 buds (indicated in red rectangles) were retained and used as explants for estradiol treatment. Scale  
 238 bars = 1 cm. (b) Mutations detected in estradiol-treated plants shown in (a). The mutation types and  
 239 corresponding number of clones are shown on the right. The sequence of sgRNA is in red, and the  
 240 PAM sequence is in bold.

241 **3. Discussion**

242 In general, plant genome editing is conducted using the CRISPR/Cas9 system, in which the  
 243 *Cas9* gene is usually driven by a constitutive CaMV 35S promoter or plant native promoter  
 244 [10,44,45,46]. However, constitutive expression of *Cas9* is not necessary, given the fact that transient  
 245 expression of *Cas9* in plants is enough to induce the targeted mutagenesis [35,45,46]. Moreover,  
 246 knockout of fundamentally significant genes (almost 10% of the Arabidopsis genome) would result  
 247 in severe pleiotropic effects or lethality [47,48], and the lack of corresponding loss-of-function  
 248 mutants makes it impossible to decipher the functions of these indispensable genes. More accurate  
 249 editing would be preferred considering that many genes express in specific context in plants [48].  
 250 Inducible genome editing can be used as an approach to overcome the limitations and accomplish  
 251 temporal and spatial editing of genes of interest. The development of inducible genome editing

252 system would expand the CRISPR toolbox and allows us to perform genome editing more flexibly.  
253 In the present study, we developed an estradiol-inducible CRISPR/Cas9 system and conducted  
254 genome editing in *N. tabacum* using this inducible system by targeting *NtPDS* gene (Figure 5 and 7).  
255 Both little plantlets and small stems with single axillary buds were used for estradiol treatment  
256 (Figure 4a and Figure 7a). The plantlets developed pale green leaves (Figure 4a) while the newly  
257 generated plants developed from buds showed white parts in leaves after estradiol treatment  
258 (Figure 7a), suggesting that the type of explants could affect the genome editing. In fact, in previous  
259 report, expression pattern of *GUS* reporter gene upon estradiol treatment varied in different tissues  
260 or organs [19]. In addition, all the tested lines (line #1, #2, #6 and #10) were found to be chimeric  
261 after induced genome editing, and several mutation types, as well as wild-type sequences, were  
262 identified from each transgenic line (Figure 5 and 7). The primary reason is that we used the T0  
263 plants for estradiol treatment, and it is nearly impossible for the edited cells to develop into new  
264 plants. Alternatively, transgenic seeds could be better materials for induced genome editing to  
265 generate edited plants. However, generation of chimeric plants avoids the adverse effect of  
266 knockout of those developmentally important genes, and transgenic plants with genetic chimera  
267 can serve as important materials for study of signaling mechanism in plants [31].

268 The results of qRT-PCR showed that the expression level of *Cas9* upon estradiol treatment  
269 varied in different transgenic lines (Figure 6), and the transcript abundance of *Cas9* can also affect  
270 the editing efficiency [49]. Furthermore, the expression level of XVE in transgenic plants also  
271 contributes to induction level of gene of interest [32]. In the XVE construct pER8, a weak  
272 constitutive G10-90 promoter was used to drive the expression of XVE [18,32,50]. Moreover, the  
273 difference of estradiol uptake between different plants had an effect on induction of target gene [32].  
274 In fact, histochemical staining assay with transgenic lines harboring pER-GUS expression cassette  
275 revealed the difference in staining intensity between different lines (Figure 2a and Figure S3). The  
276 other factors, such as the inserting loci and copies of T-DNA, may affect the induction level of target  
277 gene as well. Intriguingly, clear GUS staining was mainly detected in roots and lower leaves (Figure  
278 2a). The limited movement of estradiol within the plants could be the reason why the leaves  
279 localized at the base of plants turned pale green after estradiol treatment (Figure 4a). The  
280 concentration of estradiol and induction time are another two factors that should be considered  
281 during induction. Though the XVE system can be efficiently activated by a low concentration (8 nM)  
282 of estradiol, varying inducer concentrations were reported in different plant species [16,18,19,35]. In  
283 *Arabidopsis*, a relatively low concentration (~5  $\mu$ M) of estradiol was used for treatment [18,19], and  
284 in rice, however, the inducer concentration increased to 20  $\mu$ M [16,35]. A long incubation resulted  
285 in reduced transcript level of target gene due to instability of the inducer [18]. However, expected  
286 phenotypes were still observed in transgenic *Arabidopsis* plants after a prolonged incubation (29 d)  
287 in the presence of the inducer [19]. Moreover, transient expression of *Cas9* is sufficient to generate  
288 targeted mutagenesis [35,45]. Considering the low inducibility of target gene in leaves of intact  
289 transgenic plants treated with estradiol through root absorption [16,32], the explants used in this  
290 study were therefore cultured on estradiol-containing (20  $\mu$ M) medium for a long time (28 d).  
291 Optimization of the inducer concentrations and induction time, of course, would help to improve  
292 the expression of *Cas9* upon induction.

293 Three transgenic lines (line #5, #7 and #13) with white parts in their leaves (Figure 3d), as well  
294 as the four test lines (line #1, #2, #6 and #10), were observed to have leaky expression of *Cas9* under  
295 uninduced conditions (Figure 6). The leaky expression of the XVE system observed here was also  
296 reported in previous studies [16,32,35]. However, the leaky expression effect is generally very weak,  
297 and our GUS staining assay with pER-GUS transgenic plants revealed faint expression of GUS in  
298 roots (Figure 2a). Actually, the expression level of *Cas9* in the line #1, #2, #6 and #10 was extremely  
299 low (Figure 6), and no mutation was detected in *NtPDS* gene in these plants without treatment with  
300 estradiol (Figure 4 and Figure S5).

301 In conclusion, the XVE-based CRISPR/Cas9 system appeared to be an effective tool for induced  
302 genome editing in tobacco, and it promises to be a useful approach that allows temporal and spatial  
303 control of genome manipulation in plants after further optimization.

## 304 4. Materials and Methods

### 305 4.1. Plasmid construction

306 The plant expression vector pER8 (GenBank: AF309825.2) was linearized by digestion with  
 307 *XhoI* and *SpeI* (NEB). To develop the pER-GUS construct, the *GUS* gene was amplified from pBI121  
 308 (vector information is available in snapgene, <https://www.snapgene.com/>) using the KOD-Plus-Neo  
 309 kit (TOYOBO) with GUS-pER-F and GUS-pER-R primers (Table S1). The PCR was conducted in a  
 310 50  $\mu$ L volume and the procedure is as follows: 94 °C for 3 min; 32 cycles of 98 °C for 10s, 58 °C for  
 311 30s, and 68 °C for 130s, followed by a final extension at 68 °C for 5 min. The amplified *GUS* gene  
 312 was cloned into linearized pER8 using the ClonExpress II one step cloning kit (Vazyme) via  
 313 homologous recombination (HR). Similarly, the *Cas9* gene amplified from pCACRISPR/Cas9 [10]  
 314 using Cas9-pER-F and Cas9-pER-R primers (Table S1) was cloned into pER8 to develop the  
 315 pER-Cas9 vector. The AtU6-sgRNA expression cassette, which contains the sgRNA targeting  
 316 *NtPDS* gene, was amplified using AtU6-sgRNA-F and AtU6-sgRNA-R primers (Table S1) from  
 317 well-constructed Cas9-NtPDSg2 vector described in our previous study [39]. The AtU6-sgRNA  
 318 expression cassette was inserted into the pER-Cas9 vector via the *PmeI* site by HR. The constructed  
 319 vector was designated as pER-Cas9-NtPDS.

320

321

Table S1. List of primers used in this study.

| Primer name  | Sequence (5'-3')                      | Experiment                        |
|--------------|---------------------------------------|-----------------------------------|
| GUS-pER-F    | GAAGCTAGTCGACTCTAGCCATGGTAGATCTGAGG   | Plasmid construction              |
| GUS-pER-R    | AGGCCTGGATCGACTAGTCACACGTGGTGGTG      |                                   |
| Cas9-pER-F   | GAAGCTAGTCGACTCTAGCCATGGCCCCAAAGAAG   |                                   |
| Cas9-pER-R   | AGGCCTGGATCGACTAGGCTGGTCACCAATTC      |                                   |
| AtU6-sgRNA-F | TCCCGCCTTCAGTTTAAACTATATTCGGAGTTTTTGT |                                   |
| AtU6-sgRNA-R | CCTGTCAAACACTGATAGCACTAAACCAGCTCT     |                                   |
| GUS-PCR-F    | CTGGTATCAGCGCGAAGTCT                  | Identification of T-DNA insertion |
| GUS-PCR-R    | TCAACAGACGCGTGGTTACA                  |                                   |
| HPT-PCR-F    | GTCCGTCAGGACATTGTTGGAGCC              |                                   |
| HPT-PCR-R    | GTCTCCGACCTGATGCAGCTCTCGG             |                                   |

322

### 323 4.2. Plant transformation

324 The surface sterilized seeds of *N. tabacum* cv. Samsun germinated on Murashige and Skoog  
 325 (MS) medium (PhytoTech), and one-month-old in vitro plants were used for transformation. The  
 326 dissected tobacco leaves were incubated with *Agrobacterium tumefaciens* EHA105 cells, which  
 327 contained the constructed plasmids. The transformation was performed as previously described  
 328 [39].

### 329 4.3. Identification of transgenic plants

330 The leaves of regenerated plants were collected and genomic DNA was prepared using plant  
 331 genomic DNA kit (Aidlab) following the manufacturer's instructions. The specific primers designed  
 332 for *GUS* or *hpt* gene were used for identification of transgenic plants. The PCR with a volume of 50  
 333  $\mu$ L was carried out using Taq polymerase (Vazyme) at 95 °C for 3 min; 30 cycles of 95 °C for 15s, 60  
 334 °C for 15s, and 72 °C for 10s, followed by a final extension at 72 °C for 5 min. Around 10  $\mu$ L of the  
 335 PCR products were used for electrophoresis on an ethidium bromide-stained agarose gel (1%), and  
 336 the remaining products were further verified by Sanger sequencing. The identified T0 plants were  
 337 subcultured on MS medium and were used for estradiol treatment.

338 4.4. *Estradiol treatment*

339 The estradiol treatment was performed as previously described [16] with some modifications.  
340 A stock of 20 mM 17- $\beta$ -estradiol (Sigma-Aldrich) in dimethyl sulfoxide (DMSO) was prepared and  
341 stored at -20 °C. The stock was added in solid MS medium at a final concentration of 20  $\mu$ M before  
342 use. For estradiol treatment, one-week-old plants were transferred to MS medium with 20  $\mu$ M  
343 estradiol and were cultured for four weeks. To conduct treatment of short stems with single axillary  
344 buds, the leaves and roots of in vitro plants were excised, and small stems with only one axillary  
345 bud were retained and used for estradiol treatment. The leaves of tobacco plants before and after  
346 estradiol treatment were sampled for genomic DNA and total RNA extraction, respectively.

347 4.5. *Mutation detection*

348 For RE/PCR assay, 500 ng of the genomic DNA was first treated with *Nco*I High-Fidelity  
349 restriction enzyme (NEB) overnight at 37 °C according to the manufacturer's protocol, and then the  
350 reaction was incubated at 80 °C for another 20 min for heat inactivation. PCR was performed with  
351 KOD polymerase using 1  $\mu$ L of the mixture as the template. The untreated genomic DNA was used  
352 as the control.

353 For Sanger sequencing assay, the prepared genomic DNA was directly used as the template for  
354 PCR. The PCR products were directly sent for Sanger sequencing or were further cloned into the  
355 pLB vector (TIANGEN). A number of 20 amplicons clones from each plants were analyzed by  
356 Sanger sequencing. All the PCR reactions were carried out with NtPDS-F and NtPDS-R primers as  
357 our previously described [39].

358 4.6. *qRT-PCR analysis*

359 The qRT-PCR assay was performed as described in our previous report [39]. Briefly, total RNA  
360 was prepared with HiPure HP plant RNA mini kit following the manufacturer's instructions, and  
361 the first strand of cDNA was synthesized using HiScript III 1<sup>st</sup> strand cDNA synthesis kit (Vazyme).  
362 The relative expression level of *Cas9* gene was measured by qRT-PCR using the 2<sup>- $\Delta\Delta$ CT</sup> method [51]  
363 with the  $\beta$ -Tubulin encoding gene (accession number: U91564) being used as the internal control.

364 4.7. *Histochemical staining*

365 Histochemical staining was conducted using X-Gluc as substrate. The transgenic plants treated  
366 with 0 or 20  $\mu$ M estradiol were immersed in GUS staining solution (Coolablar) and put in a vacuum  
367 equipment. The vacuum was kept at 0.085 MPa for 30 min. Then the samples were incubated  
368 overnight at 37 °C. After staining, the samples were cleared by 95% ethanol.

369 **Supplementary Materials:** Supplementary materials are included in this study.

370 **Author Contributions:** C.R., S.L. and Z.L. conceived the study; C.R., Y.L., X.W. and Y.G. performed the  
371 experiments; C.R. and Z.L. wrote the manuscript; P.F. and S.L. revised the manuscript.

372 **Funding:** This work was funded by the grants from National Key Research and Development Program of  
373 China (2018YFD1000105), National Natural Science Foundation of China (31772266), and Sino-Africa Joint  
374 Research Center, Chinese Academy of Sciences.

375 **Acknowledgments:** We thank Elias Kirabi Gathunga (Institute of Botany, the Chinese Academy of Sciences)  
376 for proof reading.

377 **Conflicts of Interest:** The authors declare no conflict of interest.

378 **References**

379 1. Ronald, P.C. Lab to farm: applying research on plant genetics and genomics to crop  
380 improvement. *PLoS Biol.* **2014**, *126*, e1001878.

- 381 2. Scheben, A.; Wolter, F.; Batley, J.; Puchta, H.; Edwards, D. Towards CRISPR/Cas crops-bringing  
382 together genomics and genome editing. *New Phytol.* **2016**, *216*, 682-698.
- 383 3. Peng, A.; Chen, S.; Lei, T.; Xu, L.; He, Y.; Wu, L.; Yao, L.; Zou, X. Engineering canker-resistant  
384 plants through CRISPR/Cas9-targeted editing of the susceptibility gene *CsLOB1* promoter in  
385 citrus. *Plant Biotechnol. J.* **2017**, *15*, 1509-1519.
- 386 4. Wendt, T.; Holm, P.B.; Starker, C.G.; Christian, M.; Voytas, D.F.; Brinch-Pedersen, H.; Holme, I.B.  
387 TAL effector nucleases induce mutations at a pre-selected location in the genome of primary  
388 barley transformants. *Plant Mol. Biol.* **2013**, *83*, 279-285.
- 389 5. Peer, R.; Rivlin, G.; Golobovitch, S.; Lapidot, M.; Gal-On, A.; Vainstein, A.; Tzfira, T.; Flaishman,  
390 M.A. Targeted mutagenesis using zinc-finger nucleases in perennial fruit trees. *Planta* **2015**, *241*,  
391 941-951.
- 392 6. Noman, A.; Aqeel, M.; He, S. CRISPR-Cas9: Tool for qualitative and quantitative plant genome  
393 editing. *Front. Plant Sci.* **2016**, *7*, 1740.
- 394 7. Arora, L.; Narula, A. Gene editing and crop improvement using CRISPR-Cas9 system. *Front.*  
395 *Plant Sci.* **2017**, *8*, 1932.
- 396 8. Cardi, T.; Stewart, C.N.Jr. Progress of targeted genome modification approaches in higher plants.  
397 *Plant Cell Rep.* **2016**, *35*, 1401-1416.
- 398 9. Feng, Z.; Zhang, B.; Ding, W.; Liu, X.; Yang, D.L.; Wei, P.; Cao, F.; Zhu, S.; Zhang, F.; Mao, Y.;  
399 Zhu, J.K. Efficient genome editing in plants using a CRISPR/Cas system. *Cell Res.* **2013**, *23*,  
400 1229-1232.
- 401 10. Ren, C.; Liu, X.; Zhang, Z.; Wang, Y.; Duan, W.; Li, S.; Liang, Z. CRISPR/Cas9-mediated efficient  
402 targeted mutagenesis in Chardonnay (*Vitis vinifera* L.). *Sci. Rep.* **2016**, *6*, 32289.
- 403 11. Tian, S.; Jiang, L.; Gao, Q.; Zhang, J.; Zong, M.; Zhang, H.; Ren, Y.; Guo, S.; Gong, G.; Liu, F.; Xu,  
404 Y. Efficient CRISPR/Cas9-based gene knockout in watermelon. *Plant Cell Rep.* **2017**, *36*, 399-406.
- 405 12. Osakabe, Y.; Liang, Z.; Ren, C.; Nishitani, C.; Osakabe, K.; Wada, M.; Komori, S.; Malnoy, M.;  
406 Velasco, R.; Poli, M.; Jung, M.H.; Koo, O.J.; Viola, R.; Kanchiswamy, C.N. CRISPR-Cas9-mediated

- 407 genome editing in apple and grapevine. *Nat. Protoc.* **2018**, *13*, 2844-2863.
- 408 13. Barman, H.N.; Sheng, Z.; Fiaz, S.; Zhong, M.; Wu, Y.; Cai, Y.; Wang, W.; Jiao, G.; Tang, S.; Wei,  
409 X.; Hu, P. Generation of a new thermos-sensitive genic male sterile rice line by targeted  
410 mutagenesis of TMS5 gene through CRISPR/Cas9 system. *BMC Plant Biol.* **2019**, *19*, 109.
- 411 14. Pattanayak, V.; Lin, S.; Guilinger, J.P.; Ma, E.; Doudna, J.A.; Liu, D.R. High-throughput profiling  
412 of off-target DNA cleavage reveals RNA-programmed Cas9 nuclease specificity. *Nat. Biotechnol.*  
413 **2013**, *31*, 839-843.
- 414 15. Morgens, D.W.; Wainberg, M.; Boyle, E.A.; Ursu, O.; Araya, C.L.; Tsui, C.K.; Haney, M.S.; Hess,  
415 G.T.; Han, K.; Jeng, E.E.; Li, A.; Snyder, M.P.; Greenleaf, W.J.; Kundaje, A.; Bassik, M.C.  
416 Genome-scale measurement of off-target activity using Cas9 toxicity in high-throughput screens.  
417 *Nat. Commun.* **2017**, *8*, 15178.
- 418 16. Chen, Z.; Cheng, Q.; Hu, C.; Guo, X.; Chen, Z.; Lin, Y.; Hu, T.; Bellizzi, M.; Lu, G.; Wang, G.L.;  
419 Wang, Z.; Chen, S.; Wang, F. A chemical-induced, seed-soaking activation procedure for  
420 regulated gene expression in rice. *Front. Plant Sci.* **2017**, *8*, 1447.
- 421 17. Bruce, W.; Folkerts, O.; Garnaat, C.; Crasta, O.; Roth, B.; Bowen, B. Expression profiling of the  
422 maize flavonoid pathway genes controlled by  $\beta$ -estradiol-inducible transcription factors CRC and  
423 P. *Plant Cell* **2000**, *12*, 65-80.
- 424 18. Zuo, J.; Niu, Q.W.; Chua, N.H. An estrogen receptor-based transactivator XVE mediates highly  
425 inducible gene expression in transgenic plants. *Plant J.* **2000**, *24*, 265-273.
- 426 19. Brand, L.; Hörler, M.; Nüesch, E.; Vassalli, S.; Barrell, P.; Yang, W.; Jefferson, R.A.; Grossniklaus,  
427 U.; Curtis, M.D. A versatile and reliable two-component system for tissue-specific gene induction  
428 in Arabidopsis. *Plant Physiol.* **2006**, *141*, 1194-1204.
- 429 20. Caddick, M.X.; Greenland, A.J.; Jepson, I.; Krause, K.P.; Qu, N.; Riddell, K.V.; Salter, M.G.;  
430 Schuch, W.; Sonnewald, U.; Tomsett, A.B. An ethanol inducible gene switch for plants used to  
431 manipulate carbon metabolism. *Nat. Biotechnol.* **1998**, *16*, 177-180.
- 432 21. Salter, M.G.; Paine, J.A.; Riddell, K.V.; Jepson, I.; Greenland, A.J.; Caddick, M.X.; Tomsett A.B.

- 433 Characterisation of the ethanol-inducible alc gene expression system for transgenic plants. *Plant J.*  
434 **1998**, *16*, 127-132.
- 435 22. Deveaux, Y.; Peaucelle, A.; Roberts, G.R.; Coen, E.; Simon, R.; Mizukami, Y.; Traas, J.; Murray,  
436 J.A.; Doonan, J.H.; Laufs, P. The ethanol switch: a tool for tissue-specific gene induction during  
437 plant development. *Plant J.* **2003**, *36*, 918-930.
- 438 23. Maizel, A.; Weigel, D. Temporally and spatially controlled induction of gene expression in  
439 *Arabidopsis thaliana*. *Plant J.* **2004**, *38*, 164-171.
- 440 24. Ouwerkerk, P.B.; de Kam, R.J.; Hoge, J.H.; Meijer, A.H. Glucocorticoid-inducible gene  
441 expression in rice. *Planta* **2001**, *213*, 370-378.
- 442 25. Yoshida, K.; Saitoh, H.; Fujisawa, S.; Kanzaki, H.; Matsumura, H.; Yoshida, K.; Tosa, Y.; Chuma,  
443 I.; Takano, Y.; Win, J.; Kamoun, S.; Terauchi, R. Association genetics reveals three novel  
444 avirulence genes from the rice blast fungal pathogen *Magnaporthe oryzae*. *Plant Cell* **2009**, *21*,  
445 1573-1591.
- 446 26. Martinez, A.; Sparks, C.; Hart, C.A.; Thompson, J.; Jepson, I. Ecdysone agonist inducible  
447 transcription in transgenic tobacco plants. *Plant J.* **1999**, *19*, 97-106.
- 448 27. Bohner, S.; Lenk, I.; Rieping, M.; Herold, M.; Gatz, C. Transcriptional activator TGV mediates  
449 dexamethasone-inducible and tetracycline-inactivable gene expression. *Plant J.* **1999**, *19*, 87-95.
- 450 28. Roslan, H.A.; Salter, M.G.; Wood, C.D.; White, M.R.; Croft, K.P.; Robson, F.; Coupland, G.;  
451 Doonan, J.; Laufs, P.; Tomsett, A.B.; Caddick M.X. Characterization of the ethanol-inducible alc  
452 gene-expression system in *Arabidopsis thaliana*. *Plant J.* **2001**, *28*, 225-235.
- 453 29. Kang, H.G.; Fang, Y.; Singh, K.B. A glucocorticoid-inducible transcription system causes severe  
454 growth defects in *Arabidopsis* and induces defense-related genes. *Plant J.* **1999**, *20*, 127-133.
- 455 30. Amirsadeghi, S.; McDonald, A.E.; Vanlerberghe, G.C. A glucocorticoid-inducible gene  
456 expression system can cause growth defects in tobacco. *Planta* **2007**, *226*, 453-463.
- 457 31. Guo, H.S.; Fei, J.F.; Xie, Q.; Chua, N.H. A chemical-regulated inducible RNAi system in plants.  
458 *Plant J.* **2003**, *34*, 383-392.

- 459 32. Okuzaki, A.; Konagaya, K.; Nanasato, Y.; Tsuda, M.; Tabei, Y. Estrogen inducible GFP  
460 expression patterns in rice (*Oryza sativa* L.). *Plant Cell Rep.* **2011**, *30*, 529-538.
- 461 33. Moore, I.; Samalova, M.; Kurup, S. Transactivated and chemically inducible gene expression in  
462 plants. *Plant J.* **2006**, *45*, 651-683.
- 463 34. Tang, W.; Liu, D.R. Rewritable multi-event analog recording in bacterial and mammalian cells.  
464 *Science* **2018**, *360*, eaap8992.
- 465 35. Tang, X.; Zheng, X.; Qi, Y.; Zhang, D.; Cheng, Y.; Tang, A.; Voytas, D.F.; Zhang, Y. A single  
466 transcript CRISPR-Cas9 system for efficient genome editing in plants. *Mol. Plant* **2016**, *9*,  
467 1088-1091.
- 468 36. Wang, X.; Ye, L.; Ursache, R.; Mähönen, A.P. An inducible genome editing system for plants.  
469 *bioRxiv*, **2019**, doi: 10.1101/779140.
- 470 37. Fan, D.; Liu, T.; Li, C.; Jiao, B.; Li, S.; Hou, Y.; Luo, K. Efficient CRISPR/Cas9-mediated Targeted  
471 Mutagenesis in *Populus* in the First Generation. *Sci. Rep.* **2015**, *5*, 12217
- 472 38. Jefferson, R.A.; Kavanagh, T.A.; Bevan, M.W. GUS fusions: beta-glucuronidase as a sensitive  
473 and versatile gene fusion marker in higher plants. *EMBO J.* **1987**, *6*, 3901-3907.
- 474 39. Ren, C.; Guo, Y.; Gathunga, E.K.; Duan, W.; Li, S.; Liang, Z. Recovery of the non-functional  
475 EGFP-assisted identification of mutants generated by CRISPR/Cas9. *Plant Cell Rep.* **2019**, *38*,  
476 1541-1549.
- 477 40. Nekrasov, V.; Staskawicz, B.; Weigel, D.; Jones, J.D.; Kamoun, S. Targeted mutagenesis in the  
478 model plant *Nicotiana benthamiana* using Cas9 RNA-guided endonuclease. *Nat. Biotechnol.* **2013**,  
479 *31*, 691-693.
- 480 41. Shan, Q.; Wang, Y.; Li, J.; Gao, C. Genome editing in rice and wheat using the CRISPR/Cas  
481 system. *Nat. Protoc.* **2014**, *9*, 2395-2410.
- 482 42. Ma, X.; Chen, L.; Zu, Q.; Chen, Y.; Liu, Y.G. Rapid decoding of sequence-specific  
483 nuclease-induced heterozygous and biallelic mutations by direct sequencing of PCR products.  
484 *Mol. Plant* **2015**, *8*, 1285-1287.



- 485 43. Zhang, H.; Zhang, J.; Wei, P.; Zhang, B.; Gou, F.; Feng, Z.; Mao, Y.; Yang, L.; Zhang, H.; Xu, N.;  
486 Zhu, J.K. The CRISPR/Cas9 system produces specific and homozygous targeted gene editing in  
487 rice in one generation. *Plant Biotechnol. J.* **2014**, *12*, 797-807.
- 488 44. Feng, C.; Su, H.; Bai, H.; Wang, R.; Liu, Y.; Guo, X.; Liu, C.; Zhang, J.; Yuan, J.; Yan, L.H.; Wei,  
489 S.W.; Wu, Y.R.; Hu, R.L.; Li, H.J.; Yang, W.C. High efficiency genome editing in Arabidopsis  
490 using Yao promoter-driven CRISPR/Cas9 system. *Mol. Plant* **2015**, *8*, 1820-1823.
- 491 45. Malnoy, M.; Viola, R.; Jung, M.H.; Koo, O.J.; Kim, S.; Kim, J.S.; Velasco, R.; Kanchiswamy, C.N.  
492 DNA-free genetically edited grapevine and apple protoplast using CRISPR/Cas9  
493 robinucleoproteins. *Front. Plant Sci.* **2016**, *7*, 1904.
- 494 46. Osakabe, Y.; Watanabe, T.; Sugano, S.S.; Ueta, R.; Ishihara, R.; Shinozaki, K.; Osakabe, K.  
495 Optimization of CRISPR/Cas9 genome editing to modify abiotic stress responses in plants. *Sci.*  
496 *Rep.* **2016**, *6*, 26685.
- 497 47. Lloyd, J.P.; Seddon, A.E.; Moghe, G.D.; Simenc, M.C.; Shiu, S.H. Characteristics of plant  
498 essential genes allow for within- and between-species prediction of lethal mutant phenotypes.  
499 *Plant Cell* **2015**, *27*, 2133–2147.
- 500 48. Decaestecker, W.; Buono, R.A.; Pfeiffer, M.L.; Vangheluwe, N.; Jourquin J.; Karimi, M.; Van  
501 Isterdael, G.; Beeckman, T.; Nowack, M.K.; Jacobs T.B. CRISPR-TSKO: a technique for efficient  
502 mutagenesis in specific cell types, tissues, or organs in Arabidopsis. *Plant Cell* **2019**, *31*, 2868-2887.
- 503 49. Tsai, S.Q.; Zheng, Z.; Nguyen, N.T.; Liebers, M.; Topkar, V.V.; Thapar, V.; Wyvekens, N.;  
504 Khayter, C.; Iafrate, A.J.; Le, L.P.; Aryee, M.J.; Joung, J.K. GUIDE-seq enables genome-wide  
505 profiling of off-target cleavage by CRISPR-Cas nucleases. *Nat. Biotechnol.* **2015**, *33*, 187–197.
- 506 50. Zuo, J.; Niu, Q.W.; Møller, S.G.; Chua, N.H. Chemical-regulated, site-specific DNA excision in  
507 transgenic plants. *Nat. Biotechnol.* **2001**, *19*, 157-161.
- 508 51. Livak, K.J.; Schmittgen, T.D. Analysis of relative gene expression data using real-time  
509 quantitative PCR and the 2- $\Delta\Delta$ CT method. *Methods* **2001**, *25*, 402-408.
